# Supplementary material for: Efficacy of neoadjuvant chemotherapy in male breast cancer compared with female breast cancer
Source: PubMed Central journal article supplement — Cancer. 2022 Sep 7;128(21):3796–803. doi: 10.1002/cncr.34448 (PMC9826058; doi:10.1002/cncr.34448), 2022-09-07
Supplement: CNCR-128-3796-s001.pdf [file CNCR-128-3796-s001.pdf]

**ONLINE-ONLY SUPPLEMENTAL MATERIAL**

**Supplemental Table 1. Clinical responses for men and women receiving NAC**

**Supplemental Table 2. Multivariable Cox regression for overall survival**

**Supplemental Table 1. Clinical responses for men and women receiving NAC**

| Response                                 | Male |       | Female |       | P       |
|------------------------------------------|------|-------|--------|-------|---------|
|                                          | N    | %     | N      | %     |         |
| Complete clinical response               | 52   | 13.5% | 15852  | 23.3% | <0.0001 |
| Partial response                         | 103  | 26.8% | 20284  | 29.8% |         |
| Response, unknown if complete or partial | 87   | 22.6% | 11896  | 17.5% |         |
| No response                              | 41   | 10.6% | 3381   | 5.0%  |         |
| Unknown <sup>a</sup>                     | 102  | 26.5% | 16652  | 24.5% |         |

<sup>a</sup>Unknown patients are excluded from the comparative analysis

## Supplemental Table 2. Multivariable Cox regression for overall survival

| Variable              | Hazard ratio | <i>P</i> | 95.0% CI for hazard ratio |       |
|-----------------------|--------------|----------|---------------------------|-------|
|                       |              |          | Lower                     | Upper |
| Sex (Female vs. Male) | 0.888        | 0.406    | 0.672                     | 1.174 |

Adjusted for: Tumor subtype (HR+/HER2-, HR+/HER2+, HR-/HER2+, triple-negative); tumor grade (I, II, III/IV, Unknown); tumor size (T1, T2, T3, T4); nodal status (N0, N1, N2, N3); pCR (Yes, No); age at diagnosis (<50 years, 50-64 years, >64 years); race (White, Black, Other, Unknown); Charlson-Deyo score (0, 1, 2, ≥3); median income (< \$40,227; \$40,227-\$50,353; \$50,354-\$63,332; ≥\$63,333; Unknown).

Abbreviations: CI, confidence interval; HER2, human epidermal growth factor receptor 2; HR, hormone receptor; pCR, pathologic complete response
